# Supplementary material
Source: Springer Nature journal article supplement (https://www.springermedizin.de/resource/supplementary/12936_2013_2815_MOESM2_ESM.pdf/9544356)

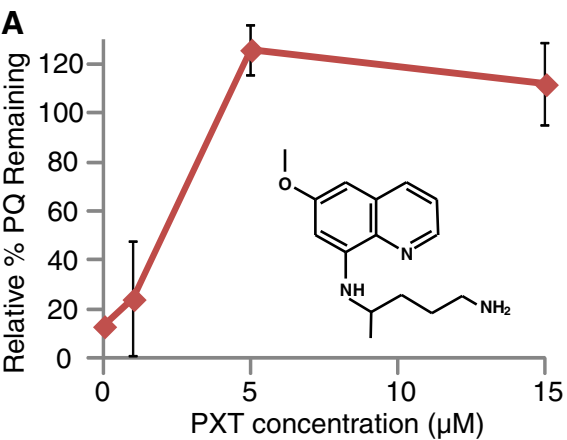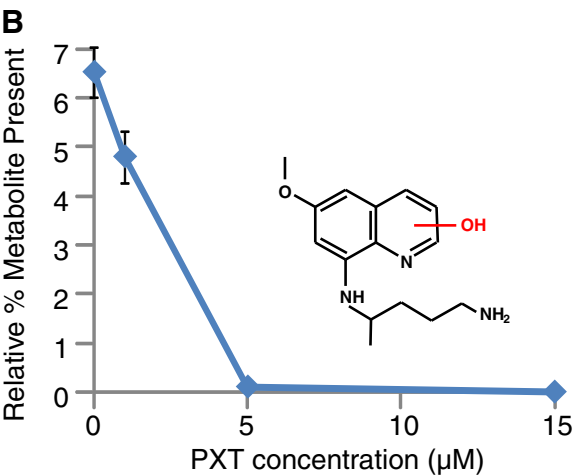

Supplement: MOESM2 [file 9544356]
